# Supplementary material for: Hydrogenation of N-propylcarbazole over supported ruthenium as a new prototype of liquid organic hydrogen carriers (LOHC)
Source: Royal Society of Chemistry journal article supplement (doi:10.1039/c3ra44760j), 2013-01-01
Supplement: c3ra44760j.pdf [file c3ra44760j.pdf]

# Supporting Information for

## Hydrogenation of N-propylcarbazole over supported ruthenium as a new prototype of liquid organic hydrogen carriers

Ming Yang,<sup>†</sup> Yuan Dong,<sup>†</sup> Shunxin Fei,<sup>†</sup> Qiyun Pan,<sup>†</sup> Gang Ni,<sup>†</sup> Chaoqun Han,<sup>†</sup> Hanzhong Ke,<sup>†</sup> Qiang Fang,<sup>§</sup> and Hansong Cheng<sup>\*†‡</sup>

<sup>†</sup>Sustainable Energy Laboratory, Faculty of Materials Science and Chemistry, China University of Geosciences, 388, Lumo Road, Wuhan 430074, P. R. China

<sup>‡</sup>Department of Chemistry, National University of Singapore, 3 Science Drive 3, Singapore

<sup>§</sup>Key Laboratory of Organofluorine Chemistry and Laboratory for Polymer Materials, Shanghai Institute of Organic Chemistry, Chinese Academy of Sciences, 345 Lingling Road, Shanghai 200032, P.R. China

### 1. Chemicals and materials

The analytical reagent grade (AR) Carbazole, Caesium carbonate, 1-Iodopropane were purchased from Energy Chemical Company. Sichuan Ally High-Tech Company supplied ultra-high purity hydrogen (99.999%). All solvents (N,N-Dimethylformamide and Hexane) were purchased from Sinopharm Chemical Reagent Company. The commercially available 5 wt% Ru on alumina catalyst was purchased from KaiDa Technology Limited.

### 2. N-propylcarbazole synthesis and characterizations

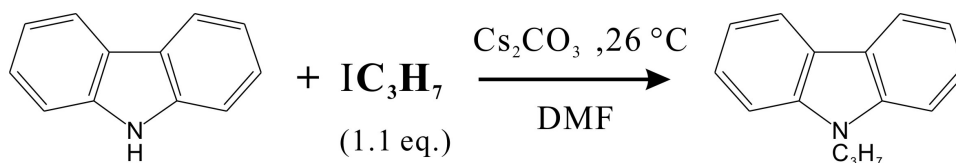

**Scheme S1** Alkylation of carbazole with 1-Iodopropane under classical conditions.

N-propylcarbazole was synthesized by solid-liquid phase alkylation of carbazole with 1-Iodopropane, as shown in Scheme S1. Caesium carbonate was used as a phase transfer catalyst. A solution of 10 mmol of the reagent carbazole and 11 mmol of 1-Iodopropane and 11 mmol of anhydrous Cs<sub>2</sub>CO<sub>3</sub> in 100 ml of dry Dimethylformamide (DMF) was poured into a

round-bottomed flask, the reaction mixture was stirred at the temperature of 26 °C. The completion of the reaction required reaction time of 30 hours. Isolated yield of final product N-propylcarbazole was in the range of 95-98 %. GC-MS analysis was carried out on an Agilent 7890A-GC-5975C-MSD instrument with a capillary column of BD-17ms (30m×320µm×0.25µm) and He as carrier gas. Melting Point System (Mettler-Toledo, M50) was used to check the melting point (m.p.) of N-propylcarbazole. The melting range was detected to be 47.2 °C to 49.6 °C.

### 3. Experimental details of hydrogenation

The catalytic hydrogenation reaction of N-propylcarbazole was carried out at 120, 130, 140 and 150 °C and a hydrogen pressure of 7 MPa in a 600 mL stainless steel autoclave batch reactor (Parr Instrument Company 4568) with continuous monitoring and control of stirrer speed, temperature and hydrogen pressure. The schematic diagram of the hydrogenation reactor is shown in Fig. S1. The reaction mixture was stirred using a magnetic stirrer at the speed of 600 rpm. In a typical experiment, 10 gram of N-propylcarbazole and 1 gram of Ru catalyst were added to the reactor. The reactor was then sealed, flushed with hydrogen and heated to the certain temperature. The system was charged with 7 MPa ultra-high pure hydrogen after the desired temperature was reached. To obtain catalytic information such as the concentration versus time profile, small liquid samples were removed periodically (every 2 min for the first 10 min; every 5 min for 10-60 min; every 15 min for 60-120 min) from the reactor for composition analysis using GC-MS (Agilent 7890A-GC-5975C-MSD instrument with a capillary column of BD-17ms).

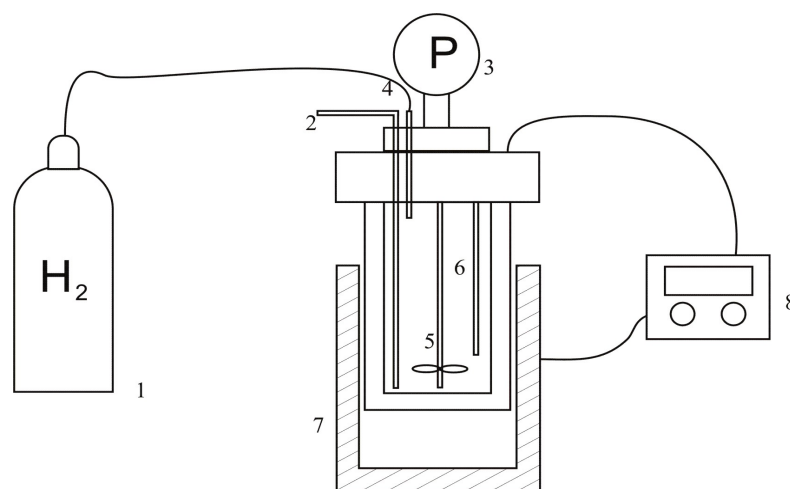

**Fig. S1** Schematic diagram of the hydrogenation reactor. 1 H<sub>2</sub> tank; 2 In situ sampling; 3 Pressure gauge; 4 H<sub>2</sub> to reactor; 5 stirring; 6 Thermocouple; 7 heater; 8 controller (connected to computer)

#### 4. Computational details of perhydro-N-propylcarbazole isomers

The DFT calculations were performed using DMol<sup>3</sup> program. The electronic structure calculations were done using a double-numeric atomic basis set (DNP) with the gradient-corrected GGA functional of PBE to account for the exchange-correlation effects. Full geometry optimization on all molecular structures was carried out without symmetry constraints.

For the full hydrogenation products, we optimized the structures of all possible conformations to identify the most stable isomers. The lowest energy isomers were found to be 12H-NPCZ-a and 12H-NPCZ-b shown in Scheme 1 (Table S1).

**Table S1** The calculated relative energies of perhydro-N-propylcarbazole isomers with the energy of 12H-NPCZ-b set to 0 kcal/mol..

| Isomer Name | Total Energy (kcal/mol) |
|-------------|-------------------------|
| 12H-NPCZ-a  | 0.2                     |
| 12H-NPCZ-b  | 0                       |
| 12H-NPCZ-c  | 2.1                     |
| 12H-NPCZ-d  | 1.1                     |
| 12H-NPCZ-e  | 2.1                     |
| 12H-NPCZ-f  | 1                       |
| 12H-NPCZ-g  | 4.6                     |
| 12H-NPCZ-h  | 2.1                     |
| 12H-NPCZ-i  | 2                       |
| 12H-NPCZ-j  | 5.8                     |
| 12H-NPCZ-k  | 1                       |

#### 5. Catalyst properties

The commercially available 5 wt% Ru on alumina catalyst was received in a reduced state. It was re-reduced prior to use as the hydrogenation catalyst. The catalyst was characterized to determine BET surface area, pore volume and pore size using a Micromeritics ASAP 2020 analyzer. Table S2 summarizes the characterization data for the Ru/alumina catalyst. BET surface area, pore volume and average pore size were also measured for the 5 wt% reduced Ru/alumina catalyst.

**Table S2** Catalyst properties of the re-reduced Ru/alumina.

| Catalyst                          | BET surface area, m <sup>2</sup> g <sup>-1</sup> | Pore volume, cm <sup>3</sup> g <sup>-1</sup> | Average pore size, nm | Tap density, g ml <sup>-1</sup> | Metal dispersion, % |
|-----------------------------------|--------------------------------------------------|----------------------------------------------|-----------------------|---------------------------------|---------------------|
| Ru/Al <sub>2</sub> O <sub>3</sub> | 108.2                                            | 0.35                                         | 12.3                  | 0.76                            | 11.4                |

**Table S3** N-propylcarbazole conversion obtained by GC-MS analysis of the samples at 120 °C.

| Time, min | Concentration, mol/L |         |         |            |            |
|-----------|----------------------|---------|---------|------------|------------|
|           | NPCZ                 | 4H-NPCZ | 8H-NPCZ | 12H-NPCZ-a | 12H-NPCZ-b |
| 0         | 4.8416               | 0       | 0       | 0          | 0          |
| 2         | 2.90496              | 1.01674 | 0.33891 | 0.09683    | 0          |
| 4         | 1.95659              | 1.50777 | 1.0024  | 0.47167    | 0          |
| 6         | 1.16198              | 1.93664 | 1.06515 | 0.67782    | 0          |
| 8         | 0.72624              | 1.5009  | 1.59773 | 1.01674    | 0.04842    |
| 10        | 0.49016              | 0.80898 | 1.91689 | 1.35817    | 0.1222     |
| 15        | 0.14651              | 0.49438 | 2.35762 | 1.74801    | 0.19197    |
| 20        | 0                    | 0.28774 | 1.84906 | 2.45256    | 0.25225    |
| 25        | 0                    | 0.10744 | 1.37366 | 3.06894    | 0.32637    |
| 30        | 0                    | 0       | 1.17796 | 3.26551    | 0.39812    |
| 35        | 0                    | 0       | 0.83029 | 3.46567    | 0.5457     |
| 40        | 0                    | 0       | 0.56952 | 3.62229    | 0.64979    |
| 45        | 0                    | 0       | 0.43632 | 3.67981    | 0.72547    |
| 50        | 0                    | 0       | 0.2016  | 3.65943    | 0.98057    |
| 55        | 0                    | 0       | 0.10211 | 3.64137    | 1.11294    |
| 60        | 0                    | 0       | 0       | 3.55654    | 1.28506    |
| 75        | 0                    | 0       | 0       | 3.45927    | 1.38233    |
| 90        | 0                    | 0       | 0       | 3.38854    | 1.45306    |
| 105       | 0                    | 0       | 0       | 3.14704    | 1.69456    |
| 120       | 0                    | 0       | 0       | 3.00179    | 1.83981    |

**Table S4** N-propylcarbazole conversion obtained by GC-MS analysis of the samples at 130 °C.

| Time, min | Concentration, mol/L |         |         |            |            |
|-----------|----------------------|---------|---------|------------|------------|
|           | NPCZ                 | 4H-NPCZ | 8H-NPCZ | 12H-NPCZ-a | 12H-NPCZ-b |
| 0         | 4.8416               | 0       | 0       | 0          | 0          |
| 2         | 2.75971              | 1.30723 | 0.58099 | 0.09712    | 0          |
| 4         | 1.73402              | 1.89428 | 1.37976 | 0.31771    | 0          |
| 6         | 0.9199               | 1.74298 | 1.64614 | 0.48416    | 0          |
| 8         | 0.58099              | 1.45248 | 1.88822 | 0.77466    | 0.04842    |
| 10        | 0.24208              | 1.22037 | 2.1334  | 1.30283    | 0.09683    |
| 15        | 0                    | 0.20388 | 2.3092  | 1.99009    | 0.19197    |
| 20        | 0                    | 0.11378 | 1.3649  | 2.79147    | 0.54274    |
| 25        | 0                    | 0       | 0.8895  | 3.31102    | 0.64108    |
| 30        | 0                    | 0       | 0.59697 | 3.36235    | 0.83387    |
| 35        | 0                    | 0       | 0.39454 | 3.46567    | 0.98144    |
| 40        | 0                    | 0       | 0.1925  | 3.41648    | 1.23078    |
| 45        | 0                    | 0       | 0       | 3.22872    | 1.60412    |
| 50        | 0                    | 0       | 0       | 2.93319    | 1.90841    |
| 55        | 0                    | 0       | 0       | 2.51763    | 2.32397    |
| 60        | 0                    | 0       | 0       | 2.03347    | 2.80813    |
| 75        | 0                    | 0       | 0       | 1.35565    | 3.48595    |
| 90        | 0                    | 0       | 0       | 0.67782    | 4.16378    |
| 105       | 0                    | 0       | 0       | 0.19366    | 4.64794    |
| 120       | 0                    | 0       | 0       | 0.09683    | 4.74477    |

**Table S5** N-propylcarbazole conversion obtained by GC-MS analysis of the samples at 140 °C.

| Time, min | Concentration, mol/L |         |         |            |            |
|-----------|----------------------|---------|---------|------------|------------|
|           | NPCZ                 | 4H-NPCZ | 8H-NPCZ | 12H-NPCZ-a | 12H-NPCZ-b |
| 0         | 4.8416               | 0       | 0       | 0          | 0          |
| 2         | 2.4208               | 1.11357 | 0.77466 | 0.43574    | 0          |
| 4         | 1.46681              | 1.68347 | 1.05213 | 0.63919    | 0          |
| 6         | 0.72624              | 1.59773 | 1.45248 | 0.96832    | 0.09683    |
| 8         | 0.2905               | 1.25882 | 1.83981 | 1.39922    | 0.16946    |
| 10        | 0                    | 1.08345 | 1.65772 | 1.84509    | 0.26837    |
| 15        | 0                    | 0.09688 | 0.96629 | 2.9604     | 0.81804    |
| 20        | 0                    | 0       | 0.42863 | 3.25452    | 1.15845    |
| 25        | 0                    | 0       | 0.20591 | 3.33272    | 1.30297    |
| 30        | 0                    | 0       | 0       | 3.28275    | 1.55885    |
| 35        | 0                    | 0       | 0       | 2.90496    | 1.93664    |
| 40        | 0                    | 0       | 0       | 2.46922    | 2.37238    |
| 45        | 0                    | 0       | 0       | 1.93664    | 2.90496    |
| 50        | 0                    | 0       | 0       | 1.35565    | 3.48595    |
| 55        | 0                    | 0       | 0       | 0.87149    | 3.97011    |
| 60        | 0                    | 0       | 0       | 0.33891    | 4.50269    |
| 75        | 0                    | 0       | 0       | 0          | 4.8416     |
| 90        | 0                    | 0       | 0       | 0          | 4.8416     |
| 105       | 0                    | 0       | 0       | 0          | 4.8416     |
| 120       | 0                    | 0       | 0       | 0          | 4.8416     |

**Table S6** N-propylcarbazole conversion obtained by GC-MS analysis of the samples at 150 °C.

| Time, min | Concentration, mol/L |         |         |            |            |
|-----------|----------------------|---------|---------|------------|------------|
|           | NPCZ                 | 4H-NPCZ | 8H-NPCZ | 12H-NPCZ-a | 12H-NPCZ-b |
| 0         | 4.8416               | 0       | 0       | 0          | 0          |
| 2         | 2.22714              | 1.16198 | 0.96832 | 0.48416    | 0          |
| 4         | 1.25882              | 1.74646 | 1.19922 | 0.6968     | 0          |
| 6         | 0.67782              | 1.30723 | 1.79139 | 0.91927    | 0.13556    |
| 8         | 0                    | 0.96832 | 2.46922 | 1.2104     | 0.21787    |
| 10        | 0                    | 0.79935 | 2.32377 | 1.42358    | 0.31679    |
| 15        | 0                    | 0.19284 | 1.42929 | 2.43741    | 0.7687     |
| 20        | 0                    | 0       | 0.59968 | 2.69222    | 1.5497     |
| 25        | 0                    | 0       | 0.41531 | 2.47038    | 1.95591    |
| 30        | 0                    | 0       | 0       | 2.55191    | 2.28969    |
| 35        | 0                    | 0       | 0       | 1.85525    | 2.98635    |
| 40        | 0                    | 0       | 0       | 1.45248    | 3.38912    |
| 45        | 0                    | 0       | 0       | 0.9199     | 3.9217     |
| 50        | 0                    | 0       | 0       | 0.48416    | 4.35744    |
| 55        | 0                    | 0       | 0       | 0.19366    | 4.64794    |
| 60        | 0                    | 0       | 0       | 0          | 4.8416     |
| 75        | 0                    | 0       | 0       | 0          | 4.8416     |
| 90        | 0                    | 0       | 0       | 0          | 4.8416     |
| 105       | 0                    | 0       | 0       | 0          | 4.8416     |
| 120       | 0                    | 0       | 0       | 0          | 4.8416     |
